# Supplementary material for: Quantification of migrant hoverfly movements (Diptera: Syrphidae) on the West Coast of North America
Source: R Soc Open Sci. 2019 Apr 3;6(4):190153. doi: 10.1098/rsos.190153 (PMC6502382; doi:10.1098/rsos.190153)
Supplement: Weather data [file rsos190153supp5.xlsx]

## Sheet: Sheet1
Weather data from US Divisional Climate Data website (https://wrcc.dri.edu/spi/divplot2map.html). Green: Average monthly values; Red: monthly data value
Weather data from Wunderground (https://www.wunderground.com) from the San Luis County Regional weather station
2017: SAN LUIS COUNTY RGNL STATION
Time	Temperature (° C)			Dew Point (° C)			Humidity (%)			Wind Speed (mph)			Pressure (Hg)			Precipation (in)
Apr	Max	Avg	Min	Max	Avg	Min	Max	Avg	Min	Max	Avg	Min	Max	Avg	Min	Max	Avg	Min
16	21	15	9	9	6	0	86	-	27	14	-	0	1018	-	1014	-	0	-
17	18	16	13	16	13	7	94	-	57	24	-	0	1018	-	1017	-	3.81	-
18	18	16	13	16	13	12	94	-	80	23	-	0	1022	-	1016	-	10.67	-
19	23	17	11	13	11	8	97	-	47	39	-	0	1023	-	1021	-	0	-
20	24	17	12	11	8	4	77	-	43	40	-	8	1023	-	1020	-	0	-
21	29	21	13	9	6	3	75	-	25	35	-	0	1020	-	1013	-	0	-
22	27	18	11	12	10	7	87	-	37	40	-	0	1015	-	1013	-	0	-
2018: SAN LUIS COUNTY RGNL STATION
Time	Temperature (° C)			Dew Point (° C)			Humidity (%)			Wind Speed (mph)			Pressure (Hg)			Precipation (in)
Apr	Max	Avg	Min	Max	Avg	Min	Max	Avg	Min	Max	Avg	Min	Max	Avg	Min	Max	Avg	Min
15	21	16	11	12	9	8	89	-	49	34	-	0	1019	-	1014	-	0	-
16	16	11	7	10	7	2	97	-	42	32	-	0	1022	-	1016	-	1.27	-
17	19	11	4	7	4	2	86	-	32	39	-	0	1026	-	1020	-	0	-
18	18	11	5	9	4	2	82	-	43	35	-	0	1019	-	1017	-	0	-
19	17	12	8	9	7	5	93	-	54	37	-	0	1020	-	1016	-	1.52	-
20	21	13	6	10	8	4	93	-	52	39	-	0	1022	-	1019	-	0	-
21	27	17	8	12	9	6	100	-	39	27	-	0	1021	-	1016	-	0	-
